# Supplementary material for: Preparation and characterization of silicone rubber cured via catalyst-free aza-Michael reaction
Source: Royal Society of Chemistry journal article supplement (doi:10.1039/c6ra23016d), 2016-01-01
Supplement: c6ra23016d1.pdf [file c6ra23016d1.pdf]

Supporting Information for

**Preparation and characterization of silicone rubber cured via catalyst-free aza-Michael reaction**

Linglong Feng, Lin Zhou and Shengyu Feng\*

Key Laboratory of Special Functional Aggregated Materials, Ministry of Education,

School of Chemistry and Chemical Engineering,

Shandong University, Jinan, 250100, People's Republic of China.

E-mail: [fsy@sdu.edu.cn](mailto:fsy@sdu.edu.cn);

Fax: +86-531-88564464;

Tel: +86-531-88364866

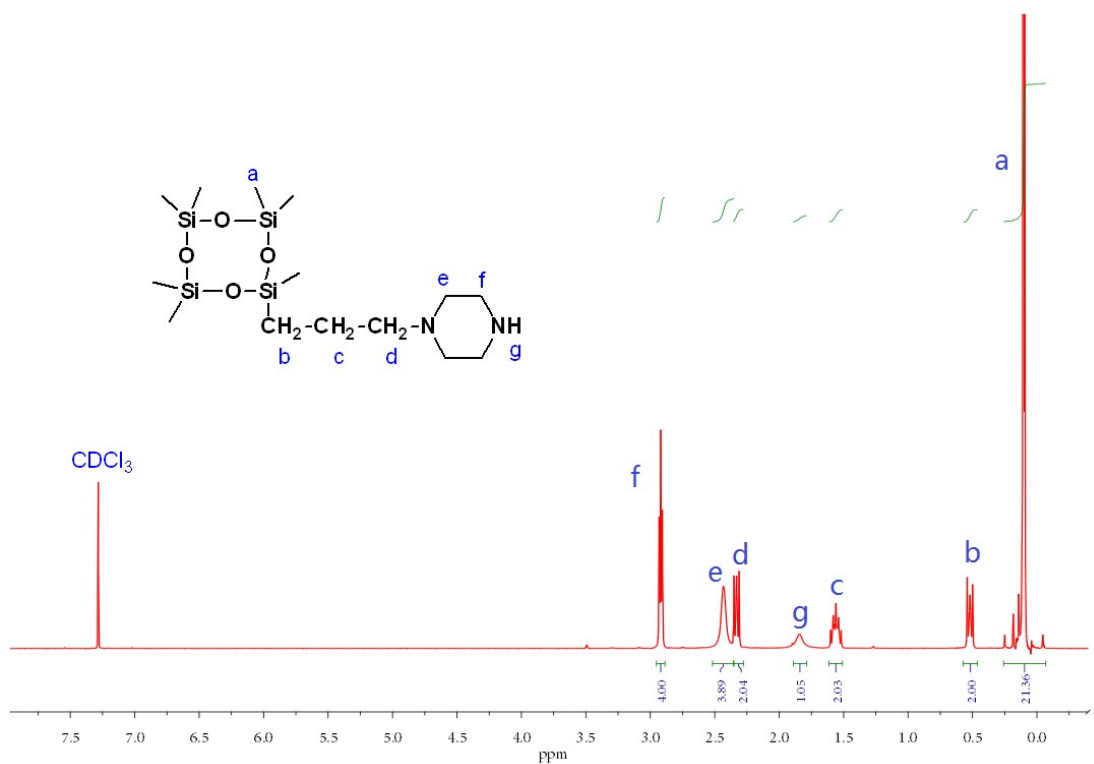

Figure 1.  $^1H$  NMR spectra of  $D_3D^{PyP}$  in  $CDCl_3$ .

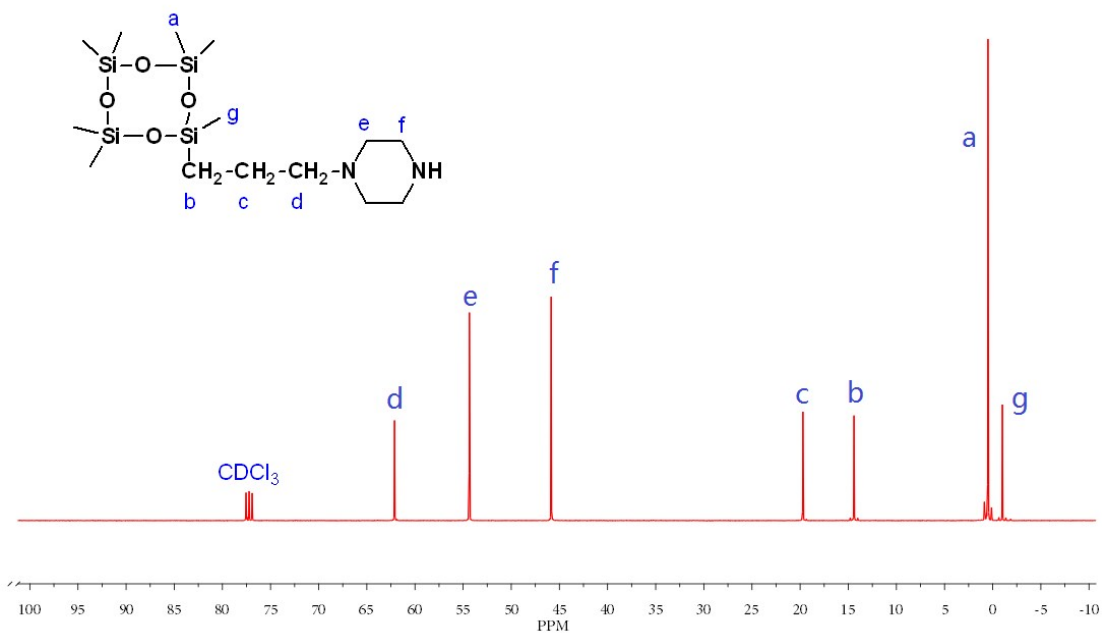

Figure 2.  $^{13}C$  NMR spectra of  $D_3D^{PyP}$  in  $CDCl_3$ .

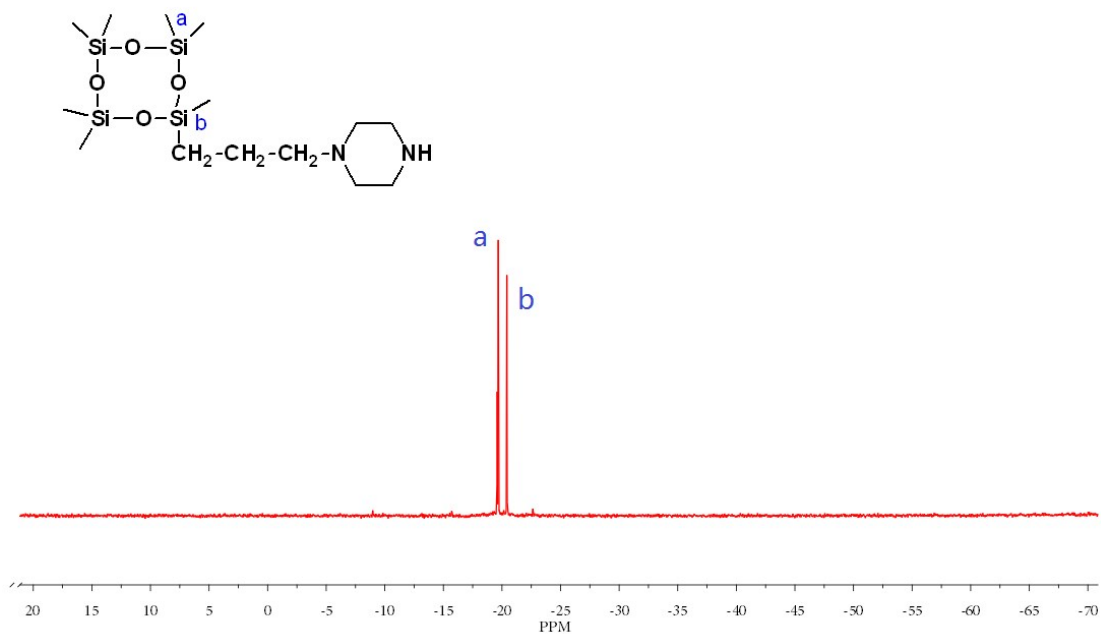

**Figure 3.**  $^{29}Si$  NMR spectra of  $D_3D^{PyP}$  in  $CDCl_3$ .

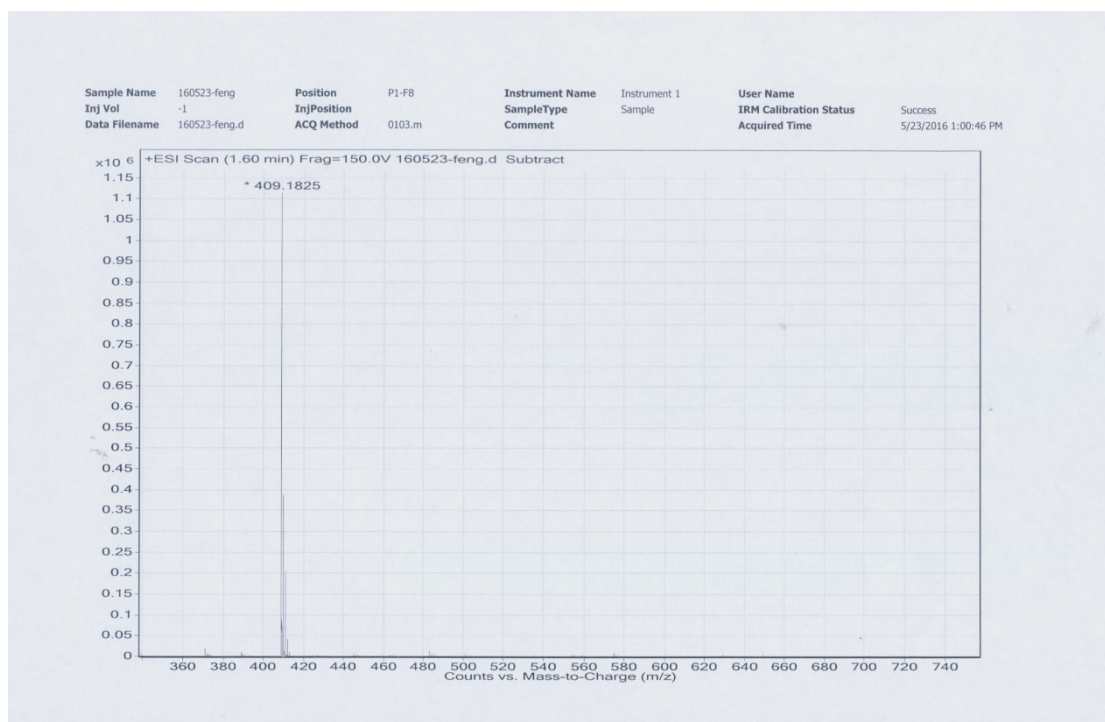

**Figure 4.** Copy of mass spectrum of  $D_3D^{PyP}$ .

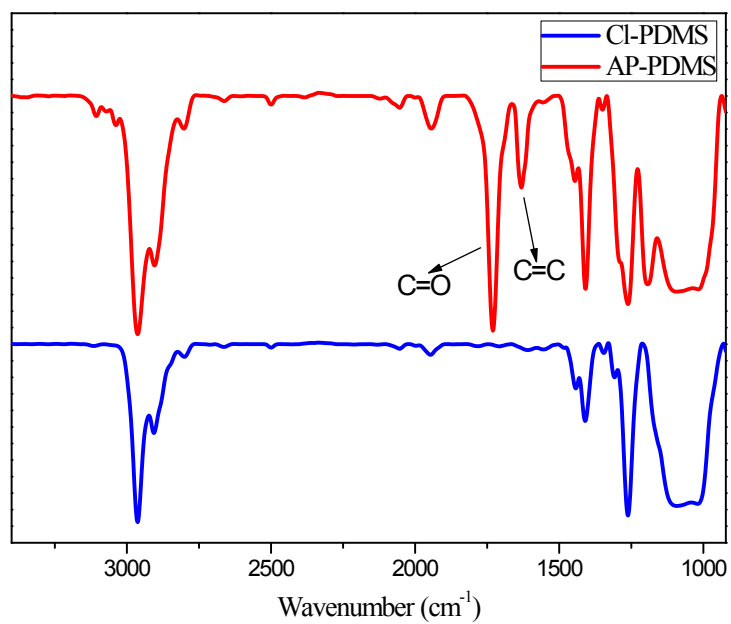

**Figure 5.** Comparison FT-IR spectra of AP-PDMS and Cl-PDMS.

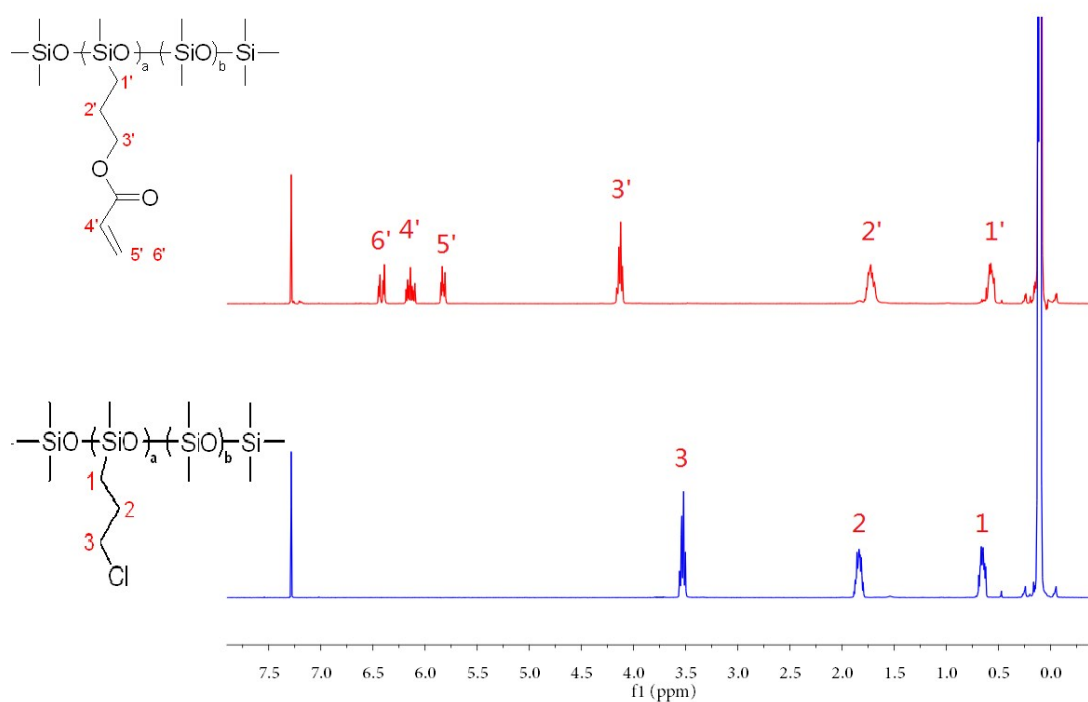

**Figure 6.** Comparison  $^1\text{H}$  NMR spectra of AP-PDMS and Cl-PDMS.

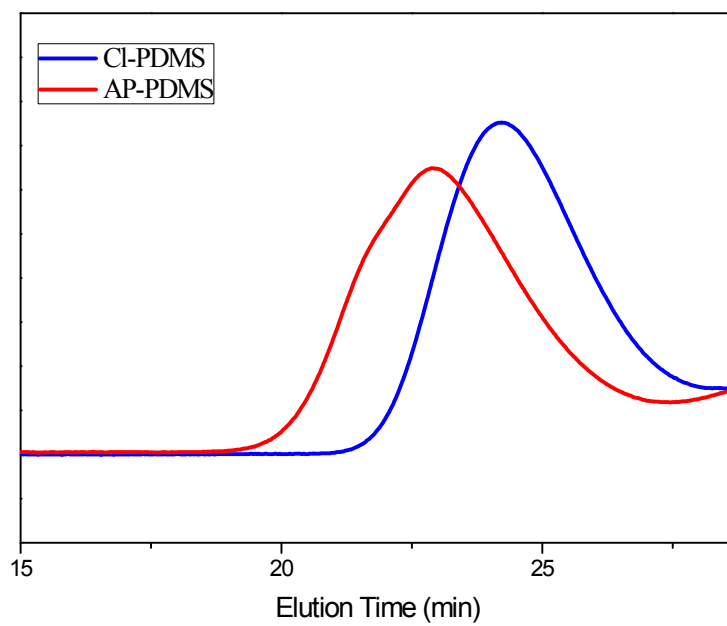

**Figure 7.** GPC traces of AP-PDMS and CI-PDMS.
